# Supplementary material for: Sexual Activity and Satisfaction in Women with Spinal Cord Disease: Influence of Urinary Incontinence and Other Predictors
Source: Research Square preprint supplement (doi:10.21203/rs.3.rs-7530704/v1), 2025-10-12
Supplement: Supplementary file 1 [file 9af4bab4ba48c3ff0f720c0d.xlsx]

## Sheet: Página1
Predictors of sexual activity
	Sexually active (n= 48)	Sexually inactive (n= 50)	P value
Age	38.0 ± 10.0	46.9 ± 12.6	< 0.001
Married/stable partner	34 (70.8%)	8 (16.0%)	<0.001
Menopause	6 (12.5%)	22(44.0%)	2
Mobility (wheelchair user)	7 (14.6%)	14 (28.0%)	4
Bladder management (CIC*)	7 (14.6%)	18 (36.0%)	15
Urinary incontinence	14 (29.2%)	37 (74.0%)	<0.001
Severe urinary incontinence	8 (16.6%)	20 (40.0%)	10
