# Supplementary material for: Sexual Activity and Satisfaction in Women with Spinal Cord Disease: Influence of Urinary Incontinence and Other Predictors
Source: Research Square preprint supplement (doi:10.21203/rs.3.rs-7530704/v1), 2025-10-12
Supplement: Supplementary file 2 [file eb7f0b662cfbde30ed8452bf.xlsx]

## Sheet: Página1
	n%
Marital Status
Single/Divorced/Widow Married/Stable Union	56 (57,1%) 42 (42,9%)
Education
High School College / Grad School Not Answered	59 (60.2%) 34 (34.7%) 5 (5.1%)
Occupation
Employed Retired Unemployed Not answered	30 (30.6%) 38 (38.8%) 26 (26.5%) 4 (4.1%)
Cause of SCD
Multiple Sclerosis Traumatic Inflammatory or infectious diseases Disc herniation Tumor Other (myelomeningocele, etc)	47 (47.9%) 14 (14.2%) 12 (12.4%) 8 (8.2%%) 3 (3,1%%) 14 (14.2%)
Duration of spinal cord disease
≤ 5 years ≥ 5 years Not Answered	21 (21.4%) 59 (60.2%) 18 (18.4%)
Neurological impairment*
Walking independently Walking with assistive device/orthosis Wheelchair user Not Answered	38 (38.8%) 26 (26.5%) 21 (21.4%) 13 (13.3%)
Bladder management
Spontaneous voiding Clean intermittent catheterization Indwelling Catheter (urethral or suprapubic)	65 (66.3%) 25 (25.5%) 8 (8.2%)
