# Supplementary material for: Sexual Activity and Satisfaction in Women with Spinal Cord Disease: Influence of Urinary Incontinence and Other Predictors
Source: Research Square preprint supplement (doi:10.21203/rs.3.rs-7530704/v1), 2025-10-12
Supplement: Supplementary file 3 [file ee6b5785cc1076d8da7cf774.xlsx]

## Sheet: Página1
Table 3- Independent predictors of sexual activity and sexual satisfaction
Variable	Sexual Activity OR (95% CI)	P value	Sexual Satisfaction OR (95% CI)	P value
Age*	0.93 (0.89–0.98)	2	0.93 (0.90–1.00)	9
Married/stable partner	10.9 (3.6–33.3)	<0.001	13.8 (4.2–45.4)	<0.001
Urinary continence	5.0 (1.7–14.4)	12	6.0 (2.0–18.2)	<0.001
